# Supplementary material for: Doping-dependent charge- and spin-density wave orderings in a monolayer of Pb adatoms on Si(111)
Source: Springer Nature journal article supplement (doi:10.1038/s41535-024-00630-w), 2024-02-15
Supplement: MOESM1 [file 41535_2024_630_MOESM1_ESM.pdf]

# Structural file for the sqrt(3) x sqrt(3) phase of Si(111):Pb

blebleble

H 10 157 P31m

RELA

12.492394 12.492394 57.699840 90.000000 90.000000 120.000000

ATOM -1: X=0.00000000 Y=0.00000000 Z=0.00000000

MULT= 1 ISPLIT= 4

Pb1 NPT= 781 R0=0.0000500 RMT= 2.50000 Z: 82.00000

LOCAL ROT MATRIX: 0.0000000 1.0000000 0.0000000  
-1.0000000 0.0000000 0.0000000  
0.0000000 0.0000000 1.0000000

ATOM -2: X=0.00000000 Y=0.68462300 Z=0.06433600

MULT= 3 ISPLIT= 8

-2: X=0.31537700 Y=0.31537700 Z=0.06433600

-2: X=0.68462300 Y=0.00000000 Z=0.06433600

Si1 NPT= 781 R0=0.00010000 RMT= 1.85 Z: 14.00000

LOCAL ROT MATRIX: 0.0000000 0.0000000 1.0000000  
1.0000000 0.0000000 0.0000000  
0.0000000 1.0000000 0.0000000

ATOM -3: X=0.00000000 Y=0.00000000 Z=0.09968200

MULT= 1 ISPLIT= 4

Si2 NPT= 781 R0=0.00010000 RMT= 1.85 Z: 14.00000

LOCAL ROT MATRIX: 0.0000000 1.0000000 0.0000000  
-1.0000000 0.0000000 0.0000000  
0.0000000 0.0000000 1.0000000

ATOM -4: X=0.33333333 Y=0.66666667 Z=0.08570100

MULT= 2 ISPLIT= 4

-4: X=0.66666667 Y=0.33333333 Z=0.08570100

Si3 NPT= 781 R0=0.00010000 RMT= 1.85 Z: 14.00000

LOCAL ROT MATRIX: 1.0000000 0.0000000 0.0000000  
0.0000000 1.0000000 0.0000000  
0.0000000 0.0000000 1.0000000

ATOM -5: X=0.00000000 Y=0.00000000 Z=0.17571500

MULT= 1 ISPLIT= 4

Si4 NPT= 781 R0=0.00010000 RMT= 1.85 Z: 14.00000

LOCAL ROT MATRIX: 0.0000000 1.0000000 0.0000000  
-1.0000000 0.0000000 0.0000000  
0.0000000 0.0000000 1.0000000

ATOM -6: X=0.33333333 Y=0.66666667 Z=0.16470700

MULT= 2 ISPLIT= 4

-6: X=0.66666667 Y=0.33333333 Z=0.16470700

Si5 NPT= 781 R0=0.00010000 RMT= 1.85 Z: 14.00000

LOCAL ROT MATRIX: 1.0000000 0.0000000 0.0000000  
0.0000000 1.0000000 0.0000000  
0.0000000 0.0000000 1.0000000

ATOM -7: X=0.34188400 Y=0.00000000 Z=0.19408400

MULT= 3 ISPLIT= 8

-7: X=0.00000000 Y=0.34188400 Z=0.19408400

-7: X=0.65811600 Y=0.65811600 Z=0.19408400

Si6 NPT= 781 R0=0.00010000 RMT= 1.85 Z: 14.00000

LOCAL ROT MATRIX: 0.0000000 0.8660254 0.5000000  
0.0000000 -0.5000000 0.8660254  
1.0000000 0.0000000 0.0000000

```

ATOM  -8: X=0.33661100 Y=0.00000000 Z=0.27161100
        MULT= 3          ISPLIT= 8
        -8: X=0.00000000 Y=0.33661100 Z=0.27161100
        -8: X=0.66338900 Y=0.66338900 Z=0.27161100
Si7      NPT= 781 R0=0.00010000 RMT= 1.85          Z: 14.00000
LOCAL ROT MATRIX:  0.0000000  0.8660254  0.5000000
                   0.0000000 -0.5000000  0.8660254
                   1.0000000  0.0000000  0.0000000
ATOM  -9: X=0.00000000 Y=0.66867000 Z=0.29732200
        MULT= 3          ISPLIT= 8
        -9: X=0.33133000 Y=0.33133000 Z=0.29732200
        -9: X=0.66867000 Y=0.00000000 Z=0.29732200
Si8      NPT= 781 R0=0.00010000 RMT= 1.85          Z: 14.00000
LOCAL ROT MATRIX:  0.0000000  0.0000000  1.0000000
                   1.0000000  0.0000000  0.0000000
                   0.0000000  1.0000000  0.0000000
ATOM -10: X=0.00000000 Y=0.67038400 Z=0.34683500
        MULT= 3          ISPLIT= 8
        -10: X=0.32961600 Y=0.32961600 Z=0.34683500
        -10: X=0.67038400 Y=0.00000000 Z=0.34683500
H 1      NPT= 781 R0=0.00010000 RMT= 0.99          Z: 1.00000
LOCAL ROT MATRIX:  0.0000000  0.0000000  1.0000000
                   1.0000000  0.0000000  0.0000000
                   0.0000000  1.0000000  0.0000000

```

6 NUMBER OF SYMMETRY OPERATIONS

```

1 0 0 0.00000000
0 1 0 0.00000000
0 0 1 0.00000000
1
0-1 0 0.00000000
1-1 0 0.00000000
0 0 1 0.00000000
2
-1 1 0 0.00000000
-1 0 0 0.00000000
0 0 1 0.00000000
3
0 1 0 0.00000000
1 0 0 0.00000000
0 0 1 0.00000000
4
1-1 0 0.00000000
0-1 0 0.00000000
0 0 1 0.00000000
5
-1 0 0 0.00000000
-1 1 0 0.00000000
0 0 1 0.00000000
6

```

# Structural file for the 3 x 3 phase of Si(111):Pb

blebleble

H 26 156 P3m1

RELA

21.637459 21.637459 57.699840 90.000000 90.000000 120.000000  
ATOM -1: X=0.00000000 Y=0.00000000 Z=0.99413158  
MULT= 1 ISPLIT= 4  
Pb1 NPT= 781 R0=0.00000500 RMT= 2.50000 Z: 82.00000  
LOCAL ROT MATRIX: 1.0000000 0.0000000 0.0000000  
0.0000000 1.0000000 0.0000000  
0.0000000 0.0000000 1.0000000  
ATOM -2: X=0.33333333 Y=0.66666667 Z=0.00140432  
MULT= 1 ISPLIT= 4  
Pb2 NPT= 781 R0=0.00000500 RMT= 2.50000 Z: 82.00000  
LOCAL ROT MATRIX: 1.0000000 0.0000000 0.0000000  
0.0000000 1.0000000 0.0000000  
0.0000000 0.0000000 1.0000000  
ATOM -3: X=0.66666667 Y=0.33333333 Z=0.00143096  
MULT= 1 ISPLIT= 4  
Pb3 NPT= 781 R0=0.00000500 RMT= 2.50000 Z: 82.00000  
LOCAL ROT MATRIX: 1.0000000 0.0000000 0.0000000  
0.0000000 1.0000000 0.0000000  
0.0000000 0.0000000 1.0000000  
ATOM -4: X=0.77285951 Y=0.22714049 Z=0.06464506  
MULT= 3 ISPLIT= 8  
-4: X=0.77285951 Y=0.54571902 Z=0.06464506  
-4: X=0.45428098 Y=0.22714049 Z=0.06464506  
Si1 NPT= 781 R0=0.00010000 RMT= 1.84 Z: 14.00000  
LOCAL ROT MATRIX: 0.0000000 0.5000000 0.8660254  
0.0000000 -0.8660254 0.5000000  
1.0000000 0.0000000 0.0000000  
ATOM -5: X=0.43961483 Y=0.56038517 Z=0.06458439  
MULT= 3 ISPLIT= 8  
-5: X=0.43961483 Y=0.87922966 Z=0.06458439  
-5: X=0.12077034 Y=0.56038517 Z=0.06458439  
Si2 NPT= 781 R0=0.00010000 RMT= 1.84 Z: 14.00000  
LOCAL ROT MATRIX: 0.0000000 0.5000000 0.8660254  
0.0000000 -0.8660254 0.5000000  
1.0000000 0.0000000 0.0000000  
ATOM -6: X=0.79453703 Y=0.89726851 Z=0.06084092  
MULT= 3 ISPLIT= 8  
-6: X=0.10273149 Y=0.89726851 Z=0.06084092  
-6: X=0.10273149 Y=0.20546297 Z=0.06084092  
Si3 NPT= 781 R0=0.00010000 RMT= 1.84 Z: 14.00000  
LOCAL ROT MATRIX: 0.0000000 1.0000000 0.0000000  
0.0000000 0.0000000 1.0000000  
1.0000000 0.0000000 0.0000000  
ATOM -7: X=0.00000000 Y=0.00000000 Z=0.09907526  
MULT= 1 ISPLIT= 4  
Si4 NPT= 781 R0=0.00010000 RMT= 1.84 Z: 14.00000  
LOCAL ROT MATRIX: 1.0000000 0.0000000 0.0000000  
0.0000000 1.0000000 0.0000000  
0.0000000 0.0000000 1.0000000

ATOM -8: X=0.33333333 Y=0.66666667 Z=0.09865712  
 MULT= 1 ISPLIT= 4  
 Si5 NPT= 781 R0=0.00010000 RMT= 1.84 Z: 14.00000  
 LOCAL ROT MATRIX: 1.0000000 0.0000000 0.0000000  
 0.0000000 1.0000000 0.0000000  
 0.0000000 0.0000000 1.0000000  
 ATOM -9: X=0.66666667 Y=0.33333333 Z=0.09880781  
 MULT= 1 ISPLIT= 4  
 Si6 NPT= 781 R0=0.00010000 RMT= 1.84 Z: 14.00000  
 LOCAL ROT MATRIX: 1.0000000 0.0000000 0.0000000  
 0.0000000 1.0000000 0.0000000  
 0.0000000 0.0000000 1.0000000  
 ATOM -10: X=0.32924123 Y=0.99807733 Z=0.08501628  
 MULT= 6 ISPLIT= 8  
 -10: X=0.00192267 Y=0.33116390 Z=0.08501628  
 -10: X=0.66883610 Y=0.67075877 Z=0.08501628  
 -10: X=0.00192267 Y=0.67075877 Z=0.08501628  
 -10: X=0.66883610 Y=0.99807733 Z=0.08501628  
 -10: X=0.32924123 Y=0.33116390 Z=0.08501628  
 Si7 NPT= 781 R0=0.00010000 RMT= 1.84 Z: 14.00000  
 LOCAL ROT MATRIX: 1.0000000 0.0000000 0.0000000  
 0.0000000 1.0000000 0.0000000  
 0.0000000 0.0000000 1.0000000  
 ATOM -11: X=0.00000000 Y=0.00000000 Z=0.17439369  
 MULT= 1 ISPLIT= 4  
 Si8 NPT= 781 R0=0.00010000 RMT= 1.84 Z: 14.00000  
 LOCAL ROT MATRIX: 1.0000000 0.0000000 0.0000000  
 0.0000000 1.0000000 0.0000000  
 0.0000000 0.0000000 1.0000000  
 ATOM -12: X=0.33333333 Y=0.66666667 Z=0.17530497  
 MULT= 1 ISPLIT= 4  
 Si9 NPT= 781 R0=0.00010000 RMT= 1.84 Z: 14.00000  
 LOCAL ROT MATRIX: 1.0000000 0.0000000 0.0000000  
 0.0000000 1.0000000 0.0000000  
 0.0000000 0.0000000 1.0000000  
 ATOM -13: X=0.66666667 Y=0.33333333 Z=0.17534516  
 MULT= 1 ISPLIT= 4  
 Si10 NPT= 781 R0=0.00010000 RMT= 1.84 Z: 14.00000  
 LOCAL ROT MATRIX: 1.0000000 0.0000000 0.0000000  
 0.0000000 1.0000000 0.0000000  
 0.0000000 0.0000000 1.0000000  
 ATOM -14: X=0.33272054 Y=0.00032393 Z=0.16435634  
 MULT= 6 ISPLIT= 8  
 -14: X=0.99967607 Y=0.33239661 Z=0.16435634  
 -14: X=0.66760339 Y=0.66727946 Z=0.16435634  
 -14: X=0.99967607 Y=0.66727946 Z=0.16435634  
 -14: X=0.66760339 Y=0.00032393 Z=0.16435634  
 -14: X=0.33272054 Y=0.33239661 Z=0.16435634  
 Si11 NPT= 781 R0=0.00010000 RMT= 1.84 Z: 14.00000  
 LOCAL ROT MATRIX: 1.0000000 0.0000000 0.0000000  
 0.0000000 1.0000000 0.0000000  
 0.0000000 0.0000000 1.0000000  
 ATOM -15: X=0.22650804 Y=0.11325402 Z=0.19448932  
 MULT= 3 ISPLIT= 8

```

-15: X=0.88674598 Y=0.11325402 Z=0.19448932
-15: X=0.88674598 Y=0.77349196 Z=0.19448932
Si12      NPT= 781 R0=0.00010000 RMT= 1.84      Z: 14.00000
LOCAL ROT MATRIX:  0.0000000 1.0000000 0.0000000
                   0.0000000 0.0000000 1.0000000
                   1.0000000 0.0000000 0.0000000
ATOM -16: X=0.21925394 Y=0.78074606 Z=0.19387431
          MULT= 3          ISPLIT= 8
-16: X=0.21925394 Y=0.43850788 Z=0.19387431
-16: X=0.56149212 Y=0.78074606 Z=0.19387431
Si13      NPT= 781 R0=0.00010000 RMT= 1.84      Z: 14.00000
LOCAL ROT MATRIX:  0.0000000 0.5000000 0.8660254
                   0.0000000-0.8660254 0.5000000
                   1.0000000 0.0000000 0.0000000
ATOM -17: X=0.55247016 Y=0.10494033 Z=0.19371103
          MULT= 3          ISPLIT= 8
-17: X=0.89505967 Y=0.44752984 Z=0.19371103
-17: X=0.55247016 Y=0.44752984 Z=0.19371103
Si14      NPT= 781 R0=0.00010000 RMT= 1.84      Z: 14.00000
LOCAL ROT MATRIX:  0.0000000-0.5000000 0.8660254
                   0.0000000-0.8660254-0.5000000
                   1.0000000 0.0000000 0.0000000
ATOM -18: X=0.22476540 Y=0.11238270 Z=0.27203995
          MULT= 3          ISPLIT= 8
-18: X=0.88761730 Y=0.11238270 Z=0.27203995
-18: X=0.88761730 Y=0.77523460 Z=0.27203995
Si15      NPT= 781 R0=0.00010000 RMT= 1.84      Z: 14.00000
LOCAL ROT MATRIX:  0.0000000 1.0000000 0.0000000
                   0.0000000 0.0000000 1.0000000
                   1.0000000 0.0000000 0.0000000
ATOM -19: X=0.55784842 Y=0.77892421 Z=0.27173982
          MULT= 3          ISPLIT= 8
-19: X=0.22107579 Y=0.77892421 Z=0.27173982
-19: X=0.22107579 Y=0.44215158 Z=0.27173982
Si16      NPT= 781 R0=0.00010000 RMT= 1.84      Z: 14.00000
LOCAL ROT MATRIX:  0.0000000 1.0000000 0.0000000
                   0.0000000 0.0000000 1.0000000
                   1.0000000 0.0000000 0.0000000
ATOM -20: X=0.55460989 Y=0.10921979 Z=0.27170261
          MULT= 3          ISPLIT= 8
-20: X=0.89078021 Y=0.44539011 Z=0.27170261
-20: X=0.55460989 Y=0.44539011 Z=0.27170261
Si17      NPT= 781 R0=0.00010000 RMT= 1.84      Z: 14.00000
LOCAL ROT MATRIX:  0.0000000-0.5000000 0.8660254
                   0.0000000-0.8660254-0.5000000
                   1.0000000 0.0000000 0.0000000
ATOM -21: X=0.11030226 Y=0.88969774 Z=0.29791032
          MULT= 3          ISPLIT= 8
-21: X=0.11030226 Y=0.22060452 Z=0.29791032
-21: X=0.77939548 Y=0.88969774 Z=0.29791032
Si18      NPT= 781 R0=0.00010000 RMT= 1.84      Z: 14.00000
LOCAL ROT MATRIX:  0.0000000 0.5000000 0.8660254
                   0.0000000-0.8660254 0.5000000
                   1.0000000 0.0000000 0.0000000

```

ATOM -22: X=0.44596332 Y=0.22298166 Z=0.29795535  
           MULT= 3                  ISPLIT= 8  
       -22: X=0.77701834 Y=0.22298166 Z=0.29795535  
       -22: X=0.77701834 Y=0.55403668 Z=0.29795535  
 Si19      NPT= 781 R0=0.00010000 RMT= 1.84          Z: 14.00000  
 LOCAL ROT MATRIX:  0.0000000 1.0000000 0.0000000  
                       0.0000000 0.0000000 1.0000000  
                       1.0000000 0.0000000 0.0000000  
 ATOM -23: X=0.44371513 Y=0.88743027 Z=0.29760186  
           MULT= 3                  ISPLIT= 8  
       -23: X=0.11256973 Y=0.55628487 Z=0.29760186  
       -23: X=0.44371513 Y=0.55628487 Z=0.29760186  
 Si20      NPT= 781 R0=0.00010000 RMT= 1.84          Z: 14.00000  
 LOCAL ROT MATRIX:  0.0000000-0.5000000 0.8660254  
                       0.0000000-0.8660254-0.5000000  
                       1.0000000 0.0000000 0.0000000  
 ATOM -24: X=0.77511490 Y=0.22488510 Z=0.34736823  
           MULT= 3                  ISPLIT= 8  
       -24: X=0.77511490 Y=0.55022980 Z=0.34736823  
       -24: X=0.44977020 Y=0.22488510 Z=0.34736823  
 H 1       NPT= 781 R0=0.00010000 RMT= 0.99          Z: 1.00000  
 LOCAL ROT MATRIX:  0.0000000 0.5000000 0.8660254  
                       0.0000000-0.8660254 0.5000000  
                       1.0000000 0.0000000 0.0000000  
 ATOM -25: X=0.44248609 Y=0.55751391 Z=0.34702569  
           MULT= 3                  ISPLIT= 8  
       -25: X=0.44248609 Y=0.88497217 Z=0.34702569  
       -25: X=0.11502783 Y=0.55751391 Z=0.34702569  
 H 2       NPT= 781 R0=0.00010000 RMT= 0.99          Z: 1.00000  
 LOCAL ROT MATRIX:  0.0000000 0.5000000 0.8660254  
                       0.0000000-0.8660254 0.5000000  
                       1.0000000 0.0000000 0.0000000  
 ATOM -26: X=0.78138476 Y=0.89069238 Z=0.34732485  
           MULT= 3                  ISPLIT= 8  
       -26: X=0.10930762 Y=0.89069238 Z=0.34732485  
       -26: X=0.10930762 Y=0.21861524 Z=0.34732485  
 H 3       NPT= 781 R0=0.00010000 RMT= 0.99          Z: 1.00000  
 LOCAL ROT MATRIX:  0.0000000 1.0000000 0.0000000  
                       0.0000000 0.0000000 1.0000000  
                       1.0000000 0.0000000 0.0000000

6 NUMBER OF SYMMETRY OPERATIONS

1 0 0 0.00000000  
 0 1 0 0.00000000  
 0 0 1 0.00000000  
   1  
 0-1 0 0.00000000  
 1-1 0 0.00000000  
 0 0 1 0.00000000  
   2  
 -1 1 0 0.00000000  
 -1 0 0 0.00000000  
   0 0 1 0.00000000  
   3  
 0-1 0 0.00000000

-1 0 0 0.00000000  
0 0 1 0.00000000  
4  
-1 1 0 0.00000000  
0 1 0 0.00000000  
0 0 1 0.00000000  
5  
1 0 0 0.00000000  
1-1 0 0.00000000  
0 0 1 0.00000000  
6
